# Supplementary material
Source: PubMed Central journal article supplement (PMC4109496)
Supplement: supp_114.213470_jpet213470Supplemental_Figures.pdf [file supp_114.213470_jpet213470Supplemental_Figures.pdf]

## Maternal-Fetal Disposition of Glyburide in Pregnant Mice Is Dependent on Gestational Age

Diana L. Shuster, Linda J. Risler, Chao-Kang J. Liang, Kenneth M. Rice, Danny D. Shen, Mary F. Hebert, Kenneth E. Thummel, and Qingcheng Mao

### Supplemental Figures:

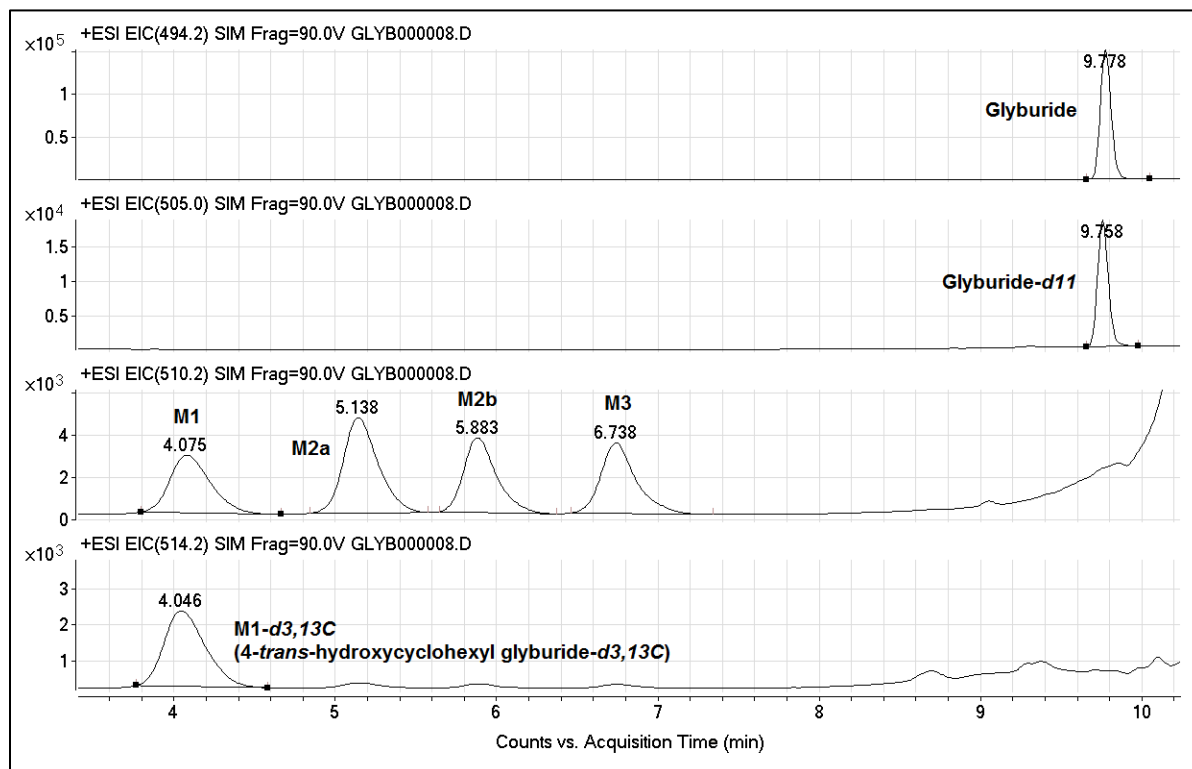

**Supplemental Figure 1. Extracted ion chromatograms (EICs) of glyburide, metabolites, and internal standards.** EIC taken from highest calibration standard injection (corresponding to 4,000 ng/ml glyburide).

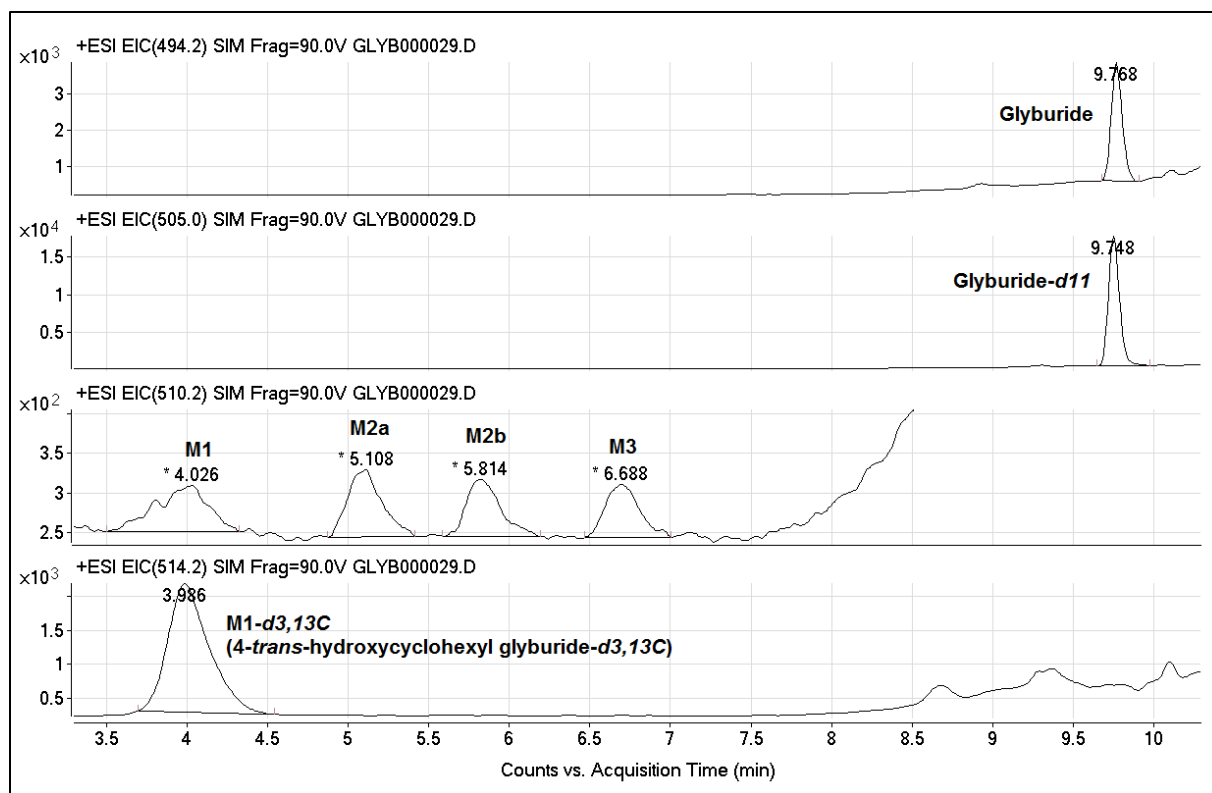

**Supplemental Figure 2. Extracted ion chromatograms of glyburide, metabolites, and internal standards corresponding to lower limit of quantification (LLOQ). The LLOQ was 10 ng/ml glyburide and 1.2 ng/ml M1-M3.**
